# Supplementary material for: Hop-derived fraction rich in beta acids and prenylflavonoids regulates the inflammatory response in dendritic cells differently from quercetin: unveiling metabolic changes by mass spectrometry-based metabolomics
Source: Royal Society of Chemistry journal article supplement (doi:10.1039/d1fo02361f), 2021-01-01
Supplement: d1fo02361f1.pdf [file d1fo02361f1.pdf]

## Supplementary material for the manuscript:

### Hop derived fraction rich in beta acids and prenylflavonoids regulates the inflammatory response in dendritic cells differently from quercetin: unveiling metabolic changes by mass spectrometry-based metabolomics

#### S1: Hop bitter acid fractionation and characterization

Hop pellet is produced by pressing hop powders, which are subsequently packaged under vacuum and stored at -2 to +4°C and this material was used in this work. Hop pellets (Target T90) were kindly donated by a local brewery company (AEFFE, Castel San Giorgio, Salerno, Italy). The whole phytocomplex was extracted as follows. In detail, 1 g of sample was extracted with 12.5 mL of CH<sub>3</sub>OH and kept under stirring for 15 minutes in the dark at room temperature. The operation was repeated three times. The supernatants were pooled, dried under reduced pressure and lyophilized. Sample was solubilized in methanol, filtered on a 0.45 µm nylon membrane prior injection in the LC system. Phytocomplex fractionation was performed on a semi-prep HPLC system LC20AP system (Shimadzu, Milan, Italy). A Luna<sup>®</sup> C18 column 250 mm × 10 mm, 5 µm was employed at a flow rate of 6 mL/min, mobile phase was: A) 0.1% CH<sub>3</sub>COOH in H<sub>2</sub>O, B) 0.1% CH<sub>3</sub>COOH in ACN. Analysis was performed in gradient as follows: 0 min, 5%B, 10 min, 5-40%B, 15 min, 40-75%B, 17 min, 75-100%B, 22 min 100%B. Detection was performed by photo diode array (PDA) and chromatograms were extracted at 280 and 330 nm. Three fractions were collected based on the retention time. In order to assess the correct fractionation process, the obtained crude fractions were further screened by UHPLC-PDA-MS/MS on a UHPLC Nexera coupled to an IT-TOF mass spectrometer (Shimadzu, Milan, Italy). A Kinetex<sup>®</sup> EVO C18 150 × 2.1 mm, 2.6 µm (Phenomenex<sup>®</sup>) column was employed at flow rate of 0.5 mL/min. The separation was carried out with the following parameters: mobile phase was: A) 0.1 % CH<sub>3</sub>COOH in H<sub>2</sub>O v/v, B) ACN plus 0.1 % CH<sub>3</sub>COOH, gradient: 0-15 min, 5-30%B, 15-20 min, 30-70 %B, 20-22 min, 70-95 %B, 22-25 min, 98-98%B, 25-30 min, 5%B. Column oven was set at 45°C, 2 µL of sample was injected. PDA detection parameters were: sampling rate 12 Hz, time constant 0.160 s and chromatograms were extracted at 280 and 330 nm. ESI- MS detection was performed as follows: detector, 1.60kV; CDL (curve desolvation line), 250 °C; heater block, 250 °C, nebulizer (N<sub>2</sub>), 1.5 L/min, drying gas, 100 kPa. MS1 150-1500 m/z, ion accumulation time, 30 ms; IT, repeat =3. MS/MS data dependent acquisition precursor range: 150-900 m/z; peak width 3 Da, accumulation time 40 ms; CID energy, 50%; repeat =3. The confirmation of metabolite identity was assessed High resolution MS and MS/MS spectra, retention time of available standards, and comparison with online database (Mass bank of north America (MoNA) and PubChem) and previous MS/MS data obtained on the same MS device.

#### S2: UHPLC-PDA-MS/MS quantitative analysis of main compounds in Fraction B and C

International Calibration Extract 4 (ICE-4) for α- and β-acids (Labor Veritas, Zurich, Switzerland) was selected as external standard for the quantification of α and β acids isolated from hop fractions (HOP B, C). ICE-4 was reported to contain 10.88% cohumulone; 31.60% n+adhumulone; 13.02% colupulone; 13.52% n+adlupulone. Stock solution (10 mg/mL) was prepared weighing 150 mg in a 15-mL volumetric flask. 8 mL of CH<sub>3</sub>OH were added to the flask, which was sonicated for 10 min

and filled to volume with CH<sub>3</sub>OH. The ICE-4 stock solution was filtered through a 0.45 µm nylon filter and was diluted with CH<sub>3</sub>OH to concentration of working solutions.

Xanthohumol was selected as external standard for its quantification in HOP C. Stock solution (1 mg/mL) of was prepared in CH<sub>3</sub>OH.

Calibration curves in the range of 5–250 µg/mL for total ICE-4 and 10 – 250 µg/mL for Xanthohumol with five concentration levels were constructed from regression analysis ( $R^2 \geq 0.999$ )

Limits of detection (LODs) and quantification (LOQs) were calculated by the ratio between the standard deviation (SD) and analytical curve slope multiplied by 3 and 10, respectively.

Note that each standard concentration level of ICE-4 contained different amounts of the individual analytes, as following reported:

| Concentration Level        | 5 µg/mL                                                   | 25 µg/mL | 50 µg/mL | 100 µg/mL | 250 µg/mL |
|----------------------------|-----------------------------------------------------------|----------|----------|-----------|-----------|
| Compound (%)               | Compound concentration in calibration curve level (µg/mL) |          |          |           |           |
| <b>Cohumulone (10.88%)</b> | 0.794                                                     | 3.971    | 7.943    | 15.885    | 39.714    |
| <b>n-Humulone (24%)</b>    | 1.736                                                     | 8.681    | 17.361   | 34.722    | 86.806    |
| <b>Adhumulone (7.6%)</b>   | 0.550                                                     | 2.749    | 5.498    | 10.995    | 27.488    |
| <b>Colupulone (13.02%)</b> | 0.942                                                     | 4.709    | 9.418    | 18.837    | 47.092    |
| <b>n-Lupulone (10.30%)</b> | 0.745                                                     | 3.725    | 7.451    | 14.902    | 37.251    |
| <b>Adlupulone (3.22%)</b>  | 0.233                                                     | 1.164    | 2.329    | 4.659     | 11.646    |

**Table S1:** Quantitative profile of  $\alpha$  and  $\beta$  acids and xanthohumol isolated from hop fractions. Values are expressed as µg/mL and µg/mg of extract mean of three replicates  $\pm$  standard deviation.

| Compound               | Hop Fraction B (HOP B) |                  | Hop Fraction C (HOP C) |                  | LOD   | LOQ   |
|------------------------|------------------------|------------------|------------------------|------------------|-------|-------|
|                        | µg/mL $\pm$ SD         | µg/mg $\pm$ SD   | µg/mL $\pm$ SD         | µg/mg $\pm$ SD   |       |       |
| <b>Oxo-Humulone</b>    | 3.529 $\pm$ 0.03       | 1.176 $\pm$ 0.01 | -                      | -                | 0.022 | 0.073 |
| <b>Humulinone</b>      | 20.14 $\pm$ 0.12       | 6.71 $\pm$ 0.03  | -                      | -                | 0.022 | 0.073 |
| <b>Cohumulone</b>      | 5.183 $\pm$ 0.02       | 1.728 $\pm$ 0.01 | -                      | -                | 0.016 | 0.054 |
| <b>Cohulupone</b>      | 106.87 $\pm$ 0.3       | 35.63 $\pm$ 0.08 | -                      | -                | 0.008 | 0.026 |
| <b>Deoxycohumulone</b> | 38.36 $\pm$ 0.26       | 12.79 $\pm$ 0.07 | -                      | -                | 0.016 | 0.054 |
| <b>Xanthohumol</b>     | -                      | -                | 65.49 $\pm$ 0.04       | 21.83 $\pm$ 0.01 | 0.209 | 0.696 |
| <b>Lupulon E</b>       | -                      | -                | 1.862 $\pm$ 0.07       | 0.621 $\pm$ 0.02 | 0.034 | 0.112 |
| <b>Colupulone</b>      | -                      | -                | 0.933 $\pm$ 0.06       | 0.311 $\pm$ 0.01 | 0.008 | 0.026 |
| <b>Lupulone</b>        | -                      | -                | 0.693 $\pm$ 0.03       | 0.231 $\pm$ 0.01 | 0.034 | 0.112 |
| <b>Adlupulone</b>      | -                      | -                | 2.751 $\pm$ 0.03       | 0.917 $\pm$ 0.01 | 0.060 | 0.207 |

**Figure S1.** Fractionation of hop pellets phytocomplex in three different fractions by semi-preparative liquid chromatography (a) and UHPLC-UV-MS analysis of the different fractions (b).

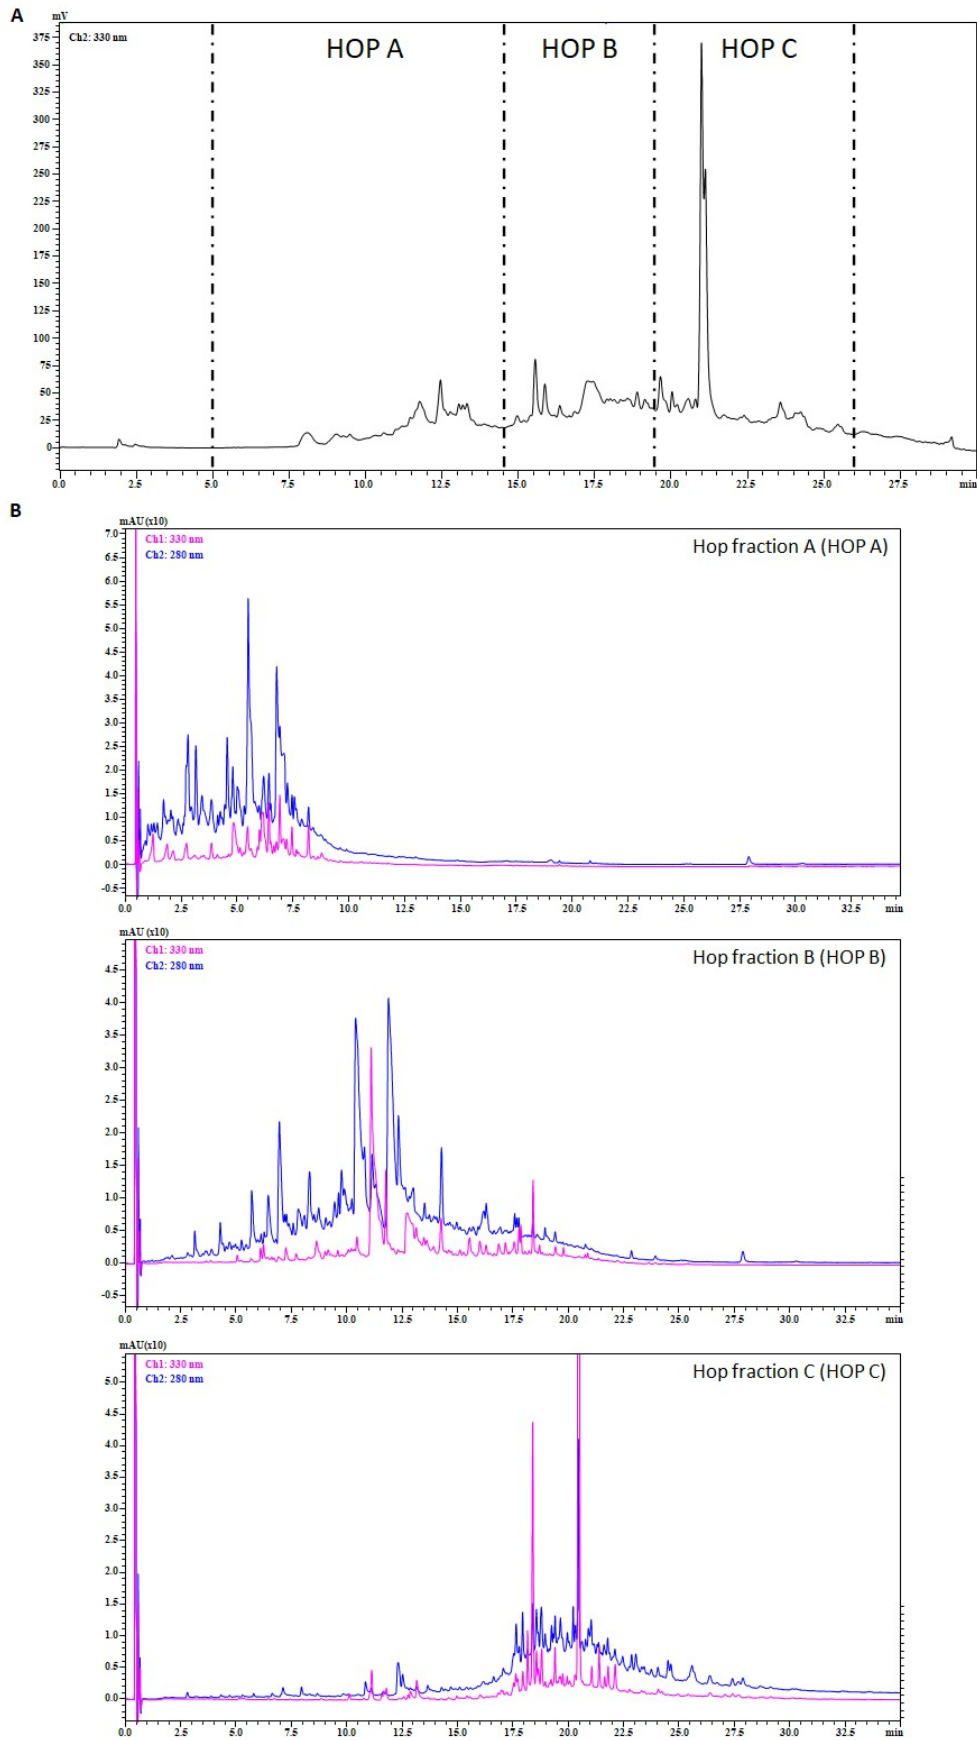

**Table S2:** UHPLC-MS/MS data of different Hop fractions

| Peak                                                                  | $r_t$<br>(min) | Compound                                        | [M-H] <sup>-</sup> | [MS/MS]                                 | Error<br>(ppm) | PDA<br>$\lambda_{max}$<br>(nm) | Molecular<br>Formula                                        |
|-----------------------------------------------------------------------|----------------|-------------------------------------------------|--------------------|-----------------------------------------|----------------|--------------------------------|-------------------------------------------------------------|
| <b>Hop Fraction A (HOP A)</b>                                         |                |                                                 |                    |                                         |                |                                |                                                             |
| <i>Hydroxycinnamic acid</i>                                           |                |                                                 |                    |                                         |                |                                |                                                             |
| 1                                                                     | 1.83           | 3'- caffeoylquinic acid (Chlorogenic acid) *    | 353.0850           | 191.0625, 179.0385                      | 0.85           | 320                            | C <sub>16</sub> H <sub>18</sub> O <sub>9</sub>              |
| 2                                                                     | 2.65           | 3'- coumaroylquinic acid                        | 337.0922           | 163.0407, 119.0394                      | -2.67          | 304                            | C <sub>16</sub> H <sub>18</sub> O <sub>8</sub>              |
| 3                                                                     | 3.52           | 3' - feruloylquinic acid                        | 367.1040           | 193.0516, 134.0216                      | 1.36           | 322                            | C <sub>17</sub> H <sub>20</sub> O <sub>9</sub>              |
| <i>Flavonols</i>                                                      |                |                                                 |                    |                                         |                |                                |                                                             |
| 4                                                                     | 6.50           | Quercetin 3-O-( 2-rhamnosyl) -hexoside          | 755.2036           | 301.0333, 255.0535<br>271.0211          | -0.53          | 256, 299                       | C <sub>33</sub> H <sub>40</sub> O <sub>2</sub> <sub>0</sub> |
| 5                                                                     | 6.99           | Quercetin 3-O-galactoside*                      | 463.0855           | 301.0346, 271.0255<br>255.0290          | -3.89          | 255                            | C <sub>21</sub> H <sub>20</sub> O <sub>1</sub> <sub>2</sub> |
| 6                                                                     | 7.48           | Rutin*                                          | 609.1445           | 301.0362, 255.0306<br>271.0269          | -4.43          | 353                            | C <sub>27</sub> H <sub>30</sub> O <sub>1</sub> <sub>6</sub> |
| 7                                                                     | 7.78           | Quercetin 3-O-glucoside*                        | 463.0855           | 301.0346, 271.0255<br>255.0290          | -4.53          | 255                            | C <sub>21</sub> H <sub>20</sub> O <sub>1</sub> <sub>2</sub> |
| 8                                                                     | 8.33           | Quercetin 3-O-(acetyl) -hexoside                | 505.0972           | 301.0381, 271.0204<br>255.0288          | -3.17          | 311                            | C <sub>23</sub> H <sub>22</sub> O <sub>1</sub> <sub>3</sub> |
| 9                                                                     | 8.63           | Kaempferol 3-O-hexoside                         | 635.1601           | 285.0384, 593.1373<br>255.0300 227.0416 | 0.63           | 262, 345                       | C <sub>29</sub> H <sub>32</sub> O <sub>1</sub> <sub>6</sub> |
| 10                                                                    | 8.88           | Kaempferol 3-O-di-hexoside                      | 593.1413           | 285.0393, 255.0279<br>227.0656          | -2.42          | 265, 344                       | C <sub>27</sub> H <sub>30</sub> O <sub>1</sub> <sub>5</sub> |
| 11                                                                    | 8.94           | Kaempferol 3-O-(malonyl-hexoside )-O-rhamnoside | 447.0949           | 285.0433, 255.0302<br>227.0741          | 4.03           | 264, 345                       | C <sub>21</sub> H <sub>20</sub> O <sub>1</sub> <sub>1</sub> |
| 12                                                                    | 2.30           | Epicatechin dimer                               | 577.1247           | 407.0662, 289.0448                      | -4.97          | 279                            | C <sub>30</sub> H <sub>26</sub> O <sub>1</sub> <sub>2</sub> |
| 13                                                                    | 3.10           | Epicatechin dimer isomer II                     | 577.1288           | 407.0729, 289.0619                      | 1.73           | 279                            | C <sub>30</sub> H <sub>26</sub> O <sub>1</sub> <sub>2</sub> |
| <b>Hop Fraction B (HOP B)</b>                                         |                |                                                 |                    |                                         |                |                                |                                                             |
| <i><math>\alpha</math>- and <math>\beta</math>- acids derivatives</i> |                |                                                 |                    |                                         |                |                                |                                                             |
| 14                                                                    | 13.50          | Oxy-humulone                                    | 393.1912           | 349.2050, 263.1292<br>395.1898          | -4.42          | 255, 323                       | C <sub>21</sub> H <sub>30</sub> O <sub>7</sub>              |
| 15                                                                    | 14.00          | Humulinone isomer                               | 377.1928           | 263.1259, 221.0969                      | -5.04          | 285, 323                       | C <sub>21</sub> H <sub>30</sub> O <sub>6</sub>              |
| 16                                                                    | 15.15          | Oxidized humulinone derivative                  | 409.1879           | 263.1285, 295.1130                      | 0.98           | 285, 323                       | C <sub>21</sub> H <sub>30</sub> O <sub>8</sub>              |
| 17                                                                    | 16.60          | Oxidized humulinone derivative isomer           | 409.1879           | 263.1285, 295.1130                      | 0.98           | 285, 323                       | C <sub>21</sub> H <sub>30</sub> O <sub>8</sub>              |
| 18                                                                    | 17.69          | Cohumulone                                      | 347.1862           | 278.1176, 235.0624                      | -0.58          | 285, 323                       | C <sub>20</sub> H <sub>28</sub> O <sub>5</sub>              |
| 19                                                                    | 18.65          | Cohumulone                                      | 363.1814           | 278.1176, 235.0624                      | -1.38          | 275, 310                       | C <sub>20</sub> H <sub>28</sub> O <sub>6</sub>              |
| 20                                                                    | 19.15          | Humulinone                                      | 377.1968           | 292.1315, 249.0765                      | -5.04          | 285, 323                       | C <sub>21</sub> H <sub>30</sub> O <sub>6</sub>              |
| 21                                                                    | 20.84          | Cohumulone isomer                               | 347.1862           | 235.0624, 278.1176                      | -0.58          | 285, 323                       | C <sub>20</sub> H <sub>28</sub> O <sub>5</sub>              |
| 22                                                                    | 21.40          | Iso- $\alpha$ -ad/n-humulone                    | 361.2015           | 265.1428, 363.1836                      | 2.21           | 285, 323                       | C <sub>21</sub> H <sub>30</sub> O <sub>5</sub>              |
| 23                                                                    | 21.70          | Deoxycohumulone                                 | 331.1920           | 262.1292, 194.0621                      | 1.51           | 290, 335                       | C <sub>20</sub> H <sub>28</sub> O <sub>4</sub>              |
| 24                                                                    | 24.30          | Prehumulone                                     | 375.1818           | 306.1319                                | 2.40           | 285, 325                       | C <sub>22</sub> H <sub>32</sub> O <sub>5</sub>              |
| 25                                                                    | 18.10          | Cohulupone                                      | 317.1765           | 248.0959, 135.3119                      | 2.21           | 280, 335                       | C <sub>19</sub> H <sub>26</sub> O <sub>4</sub>              |
| <b>Hop Fraction C (HOP C)</b>                                         |                |                                                 |                    |                                         |                |                                |                                                             |
| <i><math>\beta</math>- acids and derivatives</i>                      |                |                                                 |                    |                                         |                |                                |                                                             |
| 26                                                                    | 21.70          | Lupulone E                                      | 415.2489           | 259.1037, 303.1277                      | -0.24          | 235, 360                       | C <sub>25</sub> H <sub>36</sub> O <sub>5</sub>              |
| 27                                                                    | 22.56          | Postlupulone                                    | 385.1228           | 273.0903, 248.9524                      | -3.63          | 280, 335                       | C <sub>24</sub> H <sub>34</sub> O <sub>4</sub>              |
| 28                                                                    | 24.10          | Colupulone                                      | 399.2541           | 287.1253, 219.0712                      | -0.25          | 280, 335                       | C <sub>25</sub> H <sub>36</sub> O <sub>4</sub>              |
| 29                                                                    | 26.10          | Deoxyhumulone/deoxyadlupulone                   | 345.2064           | 346.2135, 301.2297<br>221.0866          | -2.03          | 290, 335                       | C <sub>21</sub> H <sub>30</sub> O <sub>4</sub>              |
| 30                                                                    | 26.80          | Lupulone                                        | 413.2698           | 301.1446, 344.1991,<br>233.0808         | 2.83           | 235, 360                       | C <sub>26</sub> H <sub>38</sub> O <sub>4</sub>              |
| 31                                                                    | 26.95          | Adlupolone                                      | 413.2698           | 301.1446, 344.1991,<br>233.0808         | 2.83           | 235, 360                       | C <sub>26</sub> H <sub>38</sub> O <sub>4</sub>              |
| <i>Prenylflavonoids</i>                                               |                |                                                 |                    |                                         |                |                                |                                                             |
| 32                                                                    | 18.25          | Ox-Xanthohumol                                  | 369.1336           | 249.0772                                | -5.40          | 255, 307                       | C <sub>21</sub> H <sub>22</sub> O <sub>6</sub>              |

|    |       |                   |          |                                |       |          |                                                |
|----|-------|-------------------|----------|--------------------------------|-------|----------|------------------------------------------------|
| 33 | 18.32 | Isoxanthohumol    | 353.1405 | 233.0921, 189.0277<br>175.0147 | -0.85 | 370      | C <sub>21</sub> H <sub>22</sub> O <sub>5</sub> |
| 34 | 20.10 | Xanthohumol*      | 353.1405 | 233.0921, 189.0277<br>175.0147 | -0.85 | 370      | C <sub>21</sub> H <sub>22</sub> O <sub>5</sub> |
| 35 | 25.10 | Prenyl-naringenin | 339.1229 | 219.0672, 245.0805             | -1.75 | 294, 337 | C <sub>20</sub> H <sub>20</sub> O <sub>5</sub> |

\* Identified according to standard retention times.

**Figure S2.** DCs IL-6 secretion modulation by HOP A, B and C fractions used at different concentrations. \* p-value <0.05, \*\*\* p-value <0.001, ns non-significant (A). 7-AAD staining showing the percentage of dead cells in control conditions and after the administration of LPS and/or HOP A, B or C fractions (B).

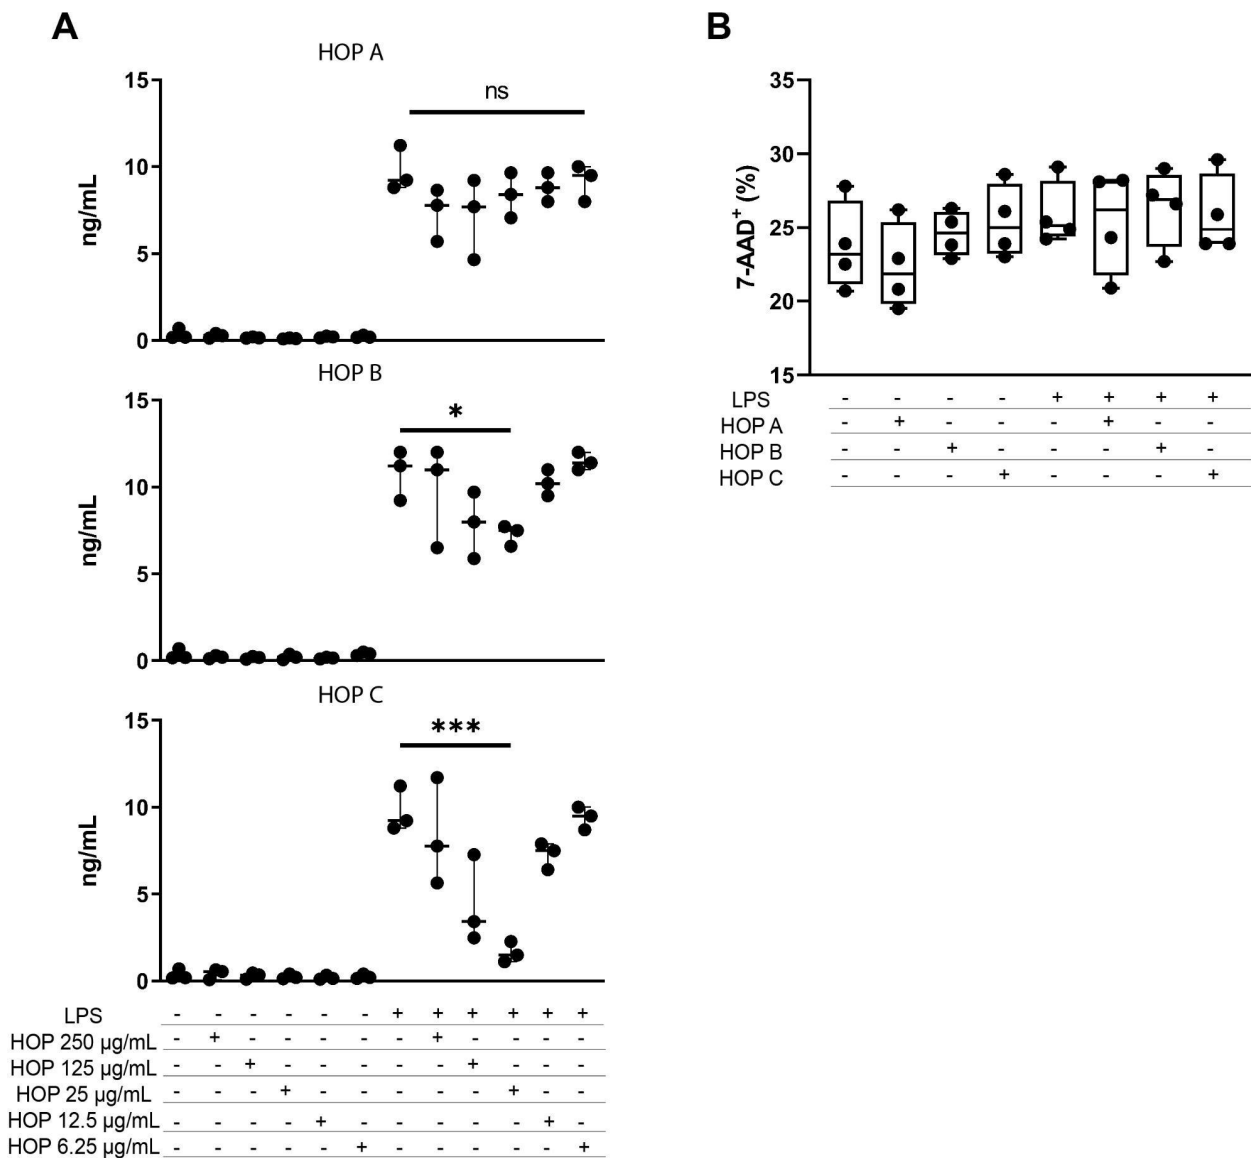

**Table S3:** List of all metabolites annotated with MSI level 2 or 3 by DI-FT-ICR and/or HILIC UHPLC-HRMS/MS and listed in alphabetical order of biochemical class.

| m/z meas. | Compound name (HMDB or LIPIDMAPS)                       | BIOCHEMICAL CLASS/SUB CLASS               | Mol. Formula                                                    | Error [ppm] | QC CV% |
|-----------|---------------------------------------------------------|-------------------------------------------|-----------------------------------------------------------------|-------------|--------|
| 162.11525 | Nicotine imine                                          | Alkaloids and derivatives                 | C <sub>10</sub> H <sub>13</sub> N <sub>2</sub>                  | 0.66        | 4.14   |
| 104.07071 | 4-Aminobutanoate                                        | Amino acids, peptides, and analogues      | C <sub>4</sub> H <sub>9</sub> NO <sub>2</sub>                   | 0.69        | 6.80   |
| 116.07082 | 5-Aminopentanoic acid                                   | Amino acids, peptides, and analogues      | C <sub>5</sub> H <sub>11</sub> NO <sub>2</sub>                  | 0.88        | 1.99   |
| 130.0497  | 5-oxo-L-Proline                                         | Amino acids, peptides, and analogues      | C <sub>5</sub> H <sub>7</sub> NO <sub>3</sub>                   | 0.30        | 4.16   |
| 90.05508  | Alanine (Ala)                                           | Amino acids, peptides, and analogues      | C <sub>3</sub> H <sub>7</sub> NO <sub>2</sub>                   | 4.9         | 0.48   |
| 159.07658 | Alanylalanine (Ala-Ala)                                 | Amino acids, peptides, and analogues      | C <sub>6</sub> H <sub>12</sub> N <sub>2</sub> O <sub>3</sub>    | 0.93        | 2.48   |
| 175.11917 | Arginine (Arg)                                          | Amino acids, peptides, and analogues      | C <sub>6</sub> H <sub>14</sub> N <sub>4</sub> O <sub>2</sub>    | 0.77        | 0.63   |
| 133.06032 | Asparagine (Asn)                                        | Amino acids, peptides, and analogues      | C <sub>4</sub> H <sub>8</sub> N <sub>2</sub> O <sub>3</sub>     | 0.49        | 1.32   |
| 168.00691 | Aspartic acid (Asp)                                     | Amino acids, peptides, and analogues      | C <sub>4</sub> H <sub>7</sub> NO <sub>4</sub>                   | 0.02        | 3.36   |
| 176.10236 | Citrulline                                              | Amino acids, peptides, and analogues      | C <sub>6</sub> H <sub>13</sub> N <sub>3</sub> O <sub>3</sub>    | 0.61        | 5.94   |
| 130.0622  | Creatine                                                | Amino acids, peptides, and analogues      | C <sub>4</sub> H <sub>9</sub> N <sub>3</sub> O <sub>2</sub>     | 0.01        | 3.65   |
| 274.14082 | Epsilon-(gamma-Glutamyl)-lysine (gamma-Glu-epsilon-lys) | Amino acids, peptides, and analogues      | C <sub>11</sub> H <sub>21</sub> N <sub>5</sub> O <sub>5</sub>   | -0.09       | 0.95   |
| 168.03022 | Furoylglycine                                           | Amino acids, peptides, and analogues      | C <sub>7</sub> H <sub>7</sub> NO <sub>4</sub>                   | -0.04       | 1.29   |
| 181.03853 | Glutamine (Gln)                                         | Amino acids, peptides, and analogues      | C <sub>5</sub> H <sub>10</sub> N <sub>2</sub> O <sub>3</sub>    | -0.11       | 0.62   |
| 182.02256 | Glutamic acid (Glu)                                     | Amino acids, peptides, and analogues      | C <sub>5</sub> H <sub>9</sub> NO <sub>4</sub>                   | 0.06        | 2.15   |
| 306.07651 | Glutathione (GSH)                                       | Amino acids, peptides, and analogues      | C <sub>10</sub> H <sub>17</sub> N <sub>3</sub> O <sub>6</sub> S | 0.12        | 2.53   |
| 190.03886 | Histidine (His)                                         | Amino acids, peptides, and analogues      | C <sub>6</sub> H <sub>9</sub> N <sub>3</sub> O <sub>2</sub>     | -0.01       | 4.92   |
| 112.08692 | Histamine                                               | Amino acids, peptides, and analogues      | C <sub>5</sub> H <sub>9</sub> N <sub>3</sub>                    | 0.04        | 0.93   |
| 130.05112 | Hydroxyproline (Hyp)                                    | Amino acids, peptides, and analogues      | C <sub>5</sub> H <sub>9</sub> NO <sub>3</sub>                   | 0.08        | 2.31   |
| 158.08227 | Isovalerylglycine                                       | Amino acids, peptides, and analogues      | C <sub>7</sub> H <sub>13</sub> NO <sub>3</sub>                  | 0.05        | 1.32   |
| 243.17151 | Isoleucylisoleucine                                     | Amino acids, peptides, and analogues      | C <sub>12</sub> H <sub>24</sub> N <sub>2</sub> O <sub>3</sub>   | 0.09        | 2.89   |
| 245.18481 | Leucylleucine (LeuLeu)                                  | Amino acids, peptides, and analogues      | C <sub>12</sub> H <sub>24</sub> N <sub>2</sub> O <sub>3</sub>   | 2.19        | 0.55   |
| 147.11285 | Lysine (Lys)                                            | Amino acids, peptides, and analogues      | C <sub>6</sub> H <sub>14</sub> N <sub>2</sub> O                 | 0.06        | 1.81   |
| 150.05788 | Methionine (Met)                                        | Amino acids, peptides, and analogues      | C <sub>5</sub> H <sub>11</sub> NO <sub>2</sub> S                | 0.12        | 0.96   |
| 200.01534 | Methionine sulfoxide                                    | Amino acids, peptides, and analogues      | C <sub>5</sub> H <sub>11</sub> NO <sub>3</sub> S                | -0.11       | 3.87   |
| 209.06981 | N-Acetylornithine                                       | Amino acids, peptides, and analogues      | C <sub>7</sub> H <sub>14</sub> N <sub>2</sub> O <sub>3</sub>    | -0.10       | 2.98   |
| 203.15018 | N,N-Dimethylarginine                                    | Amino acids, peptides, and analogues      | C <sub>8</sub> H <sub>18</sub> N <sub>4</sub> O <sub>2</sub>    | -0.49       | 1.32   |
| 223.08548 | N6-Acetyl-L-lysine                                      | Amino acids, peptides, and analogues      | C <sub>8</sub> H <sub>16</sub> N <sub>2</sub> O <sub>3</sub>    | 0.07        | 4.50   |
| 132.1019  | Norleucine                                              | Amino acids, peptides, and analogues      | C <sub>6</sub> H <sub>13</sub> NO <sub>2</sub>                  | 0.03        | 1.07   |
| 164.0717  | Phenylalanine (Phe)                                     | Amino acids, peptides, and analogues      | C <sub>9</sub> H <sub>11</sub> NO <sub>2</sub>                  | 0.01        | 0.68   |
| 192.06587 | Phenylacetylglycine                                     | Amino acids, peptides, and analogues      | C <sub>10</sub> H <sub>11</sub> NO <sub>3</sub>                 | 0.75        | 1.32   |
| 164.01199 | Pyroglutamic acid                                       | Amino acids, peptides, and analogues      | C <sub>5</sub> H <sub>7</sub> NO <sub>3</sub>                   | -0.14       | 2.19   |
| 116.07062 | Proline (Pro)                                           | Amino acids, peptides, and analogues      | C <sub>5</sub> H <sub>9</sub> NO <sub>2</sub>                   | 0.02        | 1.51   |
| 104.03423 | Serine (Ser)                                            | Amino acids, peptides, and analogues      | C <sub>3</sub> H <sub>7</sub> NO <sub>3</sub>                   | 0.15        | 0.29   |
| 152.00231 | Sulfinoalanine                                          | Amino acids, peptides, and analogues      | C <sub>3</sub> H <sub>7</sub> NO <sub>4</sub> S                 | -0.06       | 1.51   |
| 118.04976 | Threonine (Thr)                                         | Amino acids, peptides, and analogues      | C <sub>4</sub> H <sub>9</sub> NO <sub>3</sub>                   | 0.08        | 2.82   |
| 216.04327 | Tyrosine (Tyr)                                          | Amino acids, peptides, and analogues      | C <sub>9</sub> H <sub>11</sub> NO <sub>3</sub>                  | -0.23       | 2.43   |
| 118.08654 | Valine                                                  | Amino acids, peptides, and analogues      | C <sub>5</sub> H <sub>11</sub> NO <sub>2</sub>                  | 0.30        | 1.84   |
| 139.0502  | Urocanic acid                                           | Azoles                                    | C <sub>6</sub> H <sub>6</sub> N <sub>2</sub> O <sub>2</sub>     | 0.14        | 0.70   |
| 181.0710  | Iditol                                                  | Carbohydrates and carbohydrate conjugates | C <sub>6</sub> H <sub>14</sub> O <sub>6</sub>                   | 0.76        | 1.47   |
| 259.02283 | Mannose 6-phosphate                                     | Carbohydrates and carbohydrate conjugates | C <sub>6</sub> H <sub>13</sub> O <sub>9</sub> P                 | 0.40        | 2.02   |
| 259.02243 | Fructose 6-phosphate                                    | Carbohydrates and carbohydrate conjugates | C <sub>6</sub> H <sub>13</sub> O <sub>9</sub> P                 | -0.09       | 3.16   |
| 338.98876 | Fructose 1,6-bisphosphate                               | Carbohydrates and carbohydrate conjugates | C <sub>6</sub> H <sub>14</sub> O <sub>12</sub> P <sub>2</sub>   | 0.15        | 11.20  |

|           |                            |                                           |                                                                               |       |      |
|-----------|----------------------------|-------------------------------------------|-------------------------------------------------------------------------------|-------|------|
| 308.0987  | N-Acetylneuraminic acid    | Carbohydrates and carbohydrate conjugates | C <sub>11</sub> H <sub>19</sub> NO <sub>9</sub>                               | 0.34  | 4.72 |
| 275.01732 | Phosphogluconic acid       | Carbohydrates and carbohydrate conjugates | C <sub>6</sub> H <sub>13</sub> O <sub>10</sub> P                              | -0.08 | 1.49 |
| 229.01189 | Ribulose 5-phosphate       | Carbohydrates and carbohydrate conjugates | C <sub>5</sub> H <sub>11</sub> O <sub>8</sub> P                               | -0.05 | 3.50 |
| 289.03302 | Sedoheptulose 7-phosphate  | Carbohydrates and carbohydrate conjugates | C <sub>7</sub> H <sub>15</sub> O <sub>10</sub> P                              | 0.11  | 6.33 |
| 173.00914 | Aconitic acid              | Carboxylic acids and derivatives          | C <sub>6</sub> H <sub>6</sub> O <sub>6</sub>                                  | -0.11 | 1.76 |
| 191.01971 | Citric acid                | Carboxylic acids and derivatives          | C <sub>6</sub> H <sub>8</sub> O <sub>7</sub>                                  | -0.05 | 6.52 |
| 131.03371 | Glutaric acid              | Carboxylic acids and derivatives          | C <sub>5</sub> H <sub>8</sub> O <sub>4</sub>                                  | 1.28  | 5.53 |
| 117.01822 | Succinic acid              | Dicarboxylic acids and derivative         | C <sub>4</sub> H <sub>6</sub> O <sub>4</sub>                                  | 1.11  | 8.76 |
| 145.04979 | 2-Methylglutaric acid      | Fatty acids and conjugates                | C <sub>6</sub> H <sub>10</sub> O <sub>4</sub>                                 | 0.84  | 4.63 |
| 253.08336 | FA 9:0 + 10, sulfate       | Fatty Acyls [FA]                          | C <sub>6</sub> H <sub>15</sub> N <sub>4</sub> O <sub>5</sub> P                | 6.65  | 3.40 |
| 227.20107 | FA 14:0                    | Fatty Acyls [FA]                          | C <sub>14</sub> H <sub>28</sub> O <sub>2</sub>                                | 0.59  | 5.60 |
| 241.21729 | FA 15:0                    | Fatty Acyls [FA]                          | C <sub>15</sub> H <sub>30</sub> O <sub>2</sub>                                | -0.10 | 6.63 |
| 291.20962 | FA 16:0                    | Fatty Acyls [FA]                          | C <sub>16</sub> H <sub>32</sub> O <sub>2</sub>                                | -0.04 | 2.11 |
| 289.19403 | FA 16:1                    | Fatty Acyls [FA]                          | C <sub>16</sub> H <sub>30</sub> O <sub>2</sub>                                | 0.104 | 2.39 |
| 269.24976 | FA 17:0                    | Fatty Acyls [FA]                          | C <sub>17</sub> H <sub>34</sub> O <sub>2</sub>                                | 1.16  | 4.33 |
| 315.17323 | FA 17:3;O                  | Fatty Acyls [FA]                          | C <sub>17</sub> H <sub>28</sub> O <sub>3</sub>                                | -0.20 | 4.36 |
| 283.2648  | FA 18:0                    | Fatty Acyls [FA]                          | C <sub>18</sub> H <sub>36</sub> O <sub>2</sub>                                | 0.55  | 7.70 |
| 281.24855 | FA 18:1                    | Fatty Acyls [FA]                          | C <sub>18</sub> H <sub>34</sub> O <sub>2</sub>                                | -0.05 | 7.70 |
| 279.23294 | FA 18:2                    | Fatty Acyls [FA]                          | C <sub>18</sub> H <sub>32</sub> O <sub>2</sub>                                | -0.03 | 5.85 |
| 547.61929 | FA 18:4;O                  | Fatty Acyls [FA]                          | C <sub>39</sub> H <sub>8</sub> O                                              | 0.98  | 0.13 |
| 309.28098 | FA 20:1                    | Fatty Acyls [FA]                          | C <sub>20</sub> H <sub>38</sub> O <sub>2</sub>                                | 1.07  | 4.75 |
| 341.2253  | FA 20:3                    | Fatty Acyls [FA]                          | C <sub>20</sub> H <sub>34</sub> O <sub>2</sub>                                | -0.03 | 2.33 |
| 339.20965 | FA 20:4                    | Fatty Acyls [FA]                          | C <sub>20</sub> H <sub>32</sub> O <sub>2</sub>                                | 0.06  | 2.09 |
| 355.20458 | FA 20:4;O                  | Fatty Acyls [FA]                          | C <sub>20</sub> H <sub>32</sub> O <sub>3</sub>                                | 0.14  | 3.54 |
| 337.19401 | FA 20:5                    | Fatty Acyls [FA]                          | C <sub>20</sub> H <sub>30</sub> O <sub>2</sub>                                | 0.13  | 2.46 |
| 365.22533 | FA 22:5                    | Fatty Acyls [FA]                          | C <sub>22</sub> H <sub>34</sub> O <sub>2</sub>                                | 0.34  | 3.29 |
| 363.20963 | FA 22:6                    | Fatty Acyls [FA]                          | C <sub>22</sub> H <sub>32</sub> O <sub>2</sub>                                | 0.03  | 5.14 |
| 132.10203 | FA 24:9;O                  | Fatty Acyls [FA]                          | C <sub>6</sub> H <sub>13</sub> NO <sub>2</sub>                                | 0.63  | 5.04 |
| 397.40375 | FA 26:0                    | Fatty Acyls [FA]                          | C <sub>26</sub> H <sub>52</sub> O <sub>2</sub>                                | -0.62 | 6.06 |
| 410.31847 | FA 28:7                    | Fatty Acyls [FA]                          | C <sub>28</sub> H <sub>42</sub> O <sub>2</sub>                                | 0.22  | 6.41 |
| 152.99601 | FA 4:1;O2                  | Fatty Acyls [FA]                          | C <sub>4</sub> H <sub>6</sub> O <sub>4</sub>                                  | 0.02  | 0.64 |
| 115.04008 | FA 5:1;O                   | Fatty Acyls [FA]                          | C <sub>5</sub> H <sub>8</sub> O <sub>3</sub>                                  | 0.03  | 0.62 |
| 129.01934 | FA 5:2;O2                  | Fatty Acyls [FA]                          | C <sub>5</sub> H <sub>6</sub> O <sub>4</sub>                                  | 0.06  | 2.15 |
| 173.08091 | FA 8:2;O2                  | Fatty Acyls [FA]                          | C <sub>8</sub> H <sub>12</sub> O <sub>4</sub>                                 | 0.15  | 2.53 |
| 379.20459 | 17-HDoHE                   | Fatty Acyls [FA]                          | C <sub>22</sub> H <sub>32</sub> O <sub>3</sub>                                | 0.19  | 8.55 |
| 353.18892 | 5-HEPE                     | Fatty Acyls [FA]                          | C <sub>20</sub> H <sub>30</sub> O <sub>3</sub>                                | 0.04  | 4.92 |
| 204.12315 | Acetylcarnitine            | Fatty Acyls [FA]                          | C <sub>9</sub> H <sub>18</sub> NO <sub>4</sub>                                | 0.67  | 6.60 |
| 147.0299  | Citramalic acid            | Fatty Acyls [FA]                          | C <sub>5</sub> H <sub>8</sub> O <sub>5</sub>                                  | -0.01 | 3.84 |
| 129.01794 | Mesaconic acid             | Fatty Acyls [FA]                          | C <sub>5</sub> H <sub>6</sub> O <sub>4</sub>                                  | 1.89  | 4.48 |
| 786.16479 | Flavin-adenin-dinucleotide | Flavin nucleotides                        | C <sub>27</sub> H <sub>33</sub> N <sub>5</sub> O <sub>15</sub> P <sub>2</sub> | 0.36  | 1.54 |
| 783.59881 | MGDG 36:1                  | Glycerolipids [GL]                        | C <sub>45</sub> H <sub>82</sub> O <sub>10</sub>                               | 0.99  | 3.29 |
| 835.68001 | TG 51:7                    | Glycerolipids [GL]                        | C <sub>54</sub> H <sub>90</sub> O <sub>6</sub>                                | -0.90 | 1.75 |
| 854.61206 | IPC 38:0;O3                | Glycerophospholipids [GP]                 | C <sub>44</sub> H <sub>88</sub> NO <sub>12</sub> P                            | 0.40  | 1.62 |
| 480.3097  | LPC 15:0                   | Glycerophospholipids [GP]                 | C <sub>23</sub> H <sub>48</sub> NO <sub>7</sub> P                             | 0.33  | 6.44 |
| 496.33844 | LPC 16:0                   | Glycerophospholipids [GP]                 | C <sub>24</sub> H <sub>50</sub> NO <sub>7</sub> P                             | 1.77  | 1.55 |
| 522.3526  | LPC 18:1                   | Glycerophospholipids [GP]                 | C <sub>26</sub> H <sub>52</sub> NO <sub>7</sub> P                             | 3.66  | 3.68 |

|           |                |                           |                                                    |       |      |
|-----------|----------------|---------------------------|----------------------------------------------------|-------|------|
| 476.27908 | LPE 18:2       | Glycerophospholipids [GP] | C <sub>23</sub> H <sub>44</sub> NO <sub>7</sub> P  | 2.99  | 4.35 |
| 436.28337 | LPE 16:0       | Glycerophospholipids [GP] | C <sub>21</sub> H <sub>44</sub> NO <sub>6</sub> P  | -0.06 | 1.38 |
| 555.27295 | LPG 22:6       | Glycerophospholipids [GP] | C <sub>28</sub> H <sub>45</sub> O <sub>9</sub> P   | -0.58 | 8.75 |
| 619.28886 | LPI 20:4       | Glycerophospholipids [GP] | C <sub>29</sub> H <sub>49</sub> O <sub>12</sub> P  | 0.34  | 2.09 |
| 524.29946 | LPS 18:0       | Glycerophospholipids [GP] | C <sub>24</sub> H <sub>48</sub> NO <sub>9</sub> P  | 0.15  | 3.54 |
| 524.29837 | LPS 18:1       | Glycerophospholipids [GP] | C <sub>24</sub> H <sub>46</sub> NO <sub>9</sub> P  | 0.43  | 2.46 |
| 425.23017 | PA 16:0        | Glycerophospholipids [GP] | C <sub>19</sub> H <sub>37</sub> O <sub>8</sub> P   | 0.67  | 5.14 |
| 709.48193 | PA 37:4        | Glycerophospholipids [GP] | C <sub>40</sub> H <sub>71</sub> O <sub>8</sub> P   | 0.87  | 5.04 |
| 761.60541 | PA 40:0        | Glycerophospholipids [GP] | C <sub>43</sub> H <sub>85</sub> O <sub>8</sub> P   | -0.13 | 6.06 |
| 783.58926 | PA 42:3        | Glycerophospholipids [GP] | C <sub>45</sub> H <sub>83</sub> O <sub>8</sub> P   | -0.12 | 6.41 |
| 817.66783 | PA 44:0        | Glycerophospholipids [GP] | C <sub>47</sub> H <sub>93</sub> O <sub>8</sub> P   | -0.64 | 0.64 |
| 809.60633 | PA 44:4        | Glycerophospholipids [GP] | C <sub>47</sub> H <sub>85</sub> O <sub>8</sub> P   | 0.98  | 0.62 |
| 685.51872 | PA O-36:2      | Glycerophospholipids [GP] | C <sub>39</sub> H <sub>75</sub> O <sub>7</sub> P   | 0.89  | 2.15 |
| 678.54412 | PC 29:0        | Glycerophospholipids [GP] | C <sub>37</sub> H <sub>76</sub> NO <sub>7</sub> P  | 0.72  | 2.53 |
| 804.64689 | PC 37:0        | Glycerophospholipids [GP] | C <sub>45</sub> H <sub>90</sub> NO <sub>8</sub> P  | -0.62 | 8.55 |
| 840.58778 | PC 37:1        | Glycerophospholipids [GP] | C <sub>45</sub> H <sub>88</sub> NO <sub>8</sub> P  | -0.16 | 9.30 |
| 826.63135 | PC 39:3        | Glycerophospholipids [GP] | C <sub>47</sub> H <sub>88</sub> NO <sub>8</sub> P  | -0.40 | 4.92 |
| 824.61583 | PC 39:4        | Glycerophospholipids [GP] | C <sub>47</sub> H <sub>86</sub> NO <sub>8</sub> P  | -0.45 | 8.74 |
| 822.60015 | PC 39:5        | Glycerophospholipids [GP] | C <sub>47</sub> H <sub>84</sub> NO <sub>8</sub> P  | -0.58 | 6.91 |
| 846.69391 | PC 40:0        | Glycerophospholipids [GP] | C <sub>48</sub> H <sub>96</sub> NO <sub>8</sub> P  | -0.59 | 2.46 |
| 844.67848 | PC 40:1        | Glycerophospholipids [GP] | C <sub>48</sub> H <sub>94</sub> NO <sub>8</sub> P  | -0.57 | 2.11 |
| 842.66339 | PC 40:2        | Glycerophospholipids [GP] | C <sub>48</sub> H <sub>92</sub> NO <sub>8</sub> P  | -0.01 | 1.75 |
| 840.64776 | PC 40:3        | Glycerophospholipids [GP] | C <sub>48</sub> H <sub>90</sub> NO <sub>8</sub> P  | 0.21  | 5.91 |
| 796.62038 | PC O-38:4      | Glycerophospholipids [GP] | C <sub>46</sub> H <sub>86</sub> NO <sub>7</sub> P  | -0.94 | 7.79 |
| 791.59198 | PC O-42:3      | Glycerophospholipids [GP] | C <sub>45</sub> H <sub>85</sub> O <sub>7</sub> P   | -0.31 | 2.31 |
| 500.27849 | PE 20:4        | Glycerophospholipids [GP] | C <sub>25</sub> H <sub>44</sub> NO <sub>7</sub> P  | 0.48  | 1.86 |
| 844.58521 | PE 44:8        | Glycerophospholipids [GP] | C <sub>49</sub> H <sub>82</sub> NO <sub>8</sub> P  | -0.21 | 6.52 |
| 722.51292 | PE O-36:5      | Glycerophospholipids [GP] | C <sub>41</sub> H <sub>74</sub> NO <sub>7</sub> P  | -0.28 | 1.41 |
| 780.58965 | PE O-40:4      | Glycerophospholipids [GP] | C <sub>45</sub> H <sub>82</sub> NO <sub>7</sub> P  | -0.22 | 3.82 |
| 804.59091 | PE O-42:7      | Glycerophospholipids [GP] | C <sub>47</sub> H <sub>82</sub> NO <sub>7</sub> P  | 0.84  | 1.76 |
| 747.51838 | PG 34:1        | Glycerophospholipids [GP] | C <sub>40</sub> H <sub>77</sub> O <sub>10</sub> P  | -0.06 | 3.66 |
| 773.53427 | PG 36:2        | Glycerophospholipids [GP] | C <sub>42</sub> H <sub>79</sub> O <sub>10</sub> P  | 0.89  | 5.17 |
| 819.51802 | PG 40:7        | Glycerophospholipids [GP] | C <sub>46</sub> H <sub>77</sub> O <sub>10</sub> P  | -0.47 | 4.23 |
| 719.52324 | PG O-33:1      | Glycerophospholipids [GP] | C <sub>39</sub> H <sub>77</sub> O <sub>9</sub> P   | 0.06  | 4.61 |
| 829.62952 | PG O-39:0      | Glycerophospholipids [GP] | C <sub>45</sub> H <sub>91</sub> O <sub>9</sub> P   | 0.30  | 2.15 |
| 184.07303 | Phosphocholine | Glycerophospholipids [GP] | C <sub>5</sub> H <sub>15</sub> NO <sub>4</sub> P   | 0.26  | 6.32 |
| 883.53529 | PI 38:5        | Glycerophospholipids [GP] | C <sub>47</sub> H <sub>81</sub> O <sub>13</sub> P  | 0.94  | 6.09 |
| 877.61726 | PI O-38:2      | Glycerophospholipids [GP] | C <sub>47</sub> H <sub>89</sub> O <sub>12</sub> P  | 0.95  | 2.19 |
| 766.46595 | PS 35:5        | Glycerophospholipids [GP] | C <sub>41</sub> H <sub>70</sub> NO <sub>10</sub> P | -0.08 | 3.73 |
| 830.59041 | PS 39:2        | Glycerophospholipids [GP] | C <sub>45</sub> H <sub>84</sub> NO <sub>10</sub> P | -0.28 | 9.55 |
| 848.63757 | PS 40:0        | Glycerophospholipids [GP] | C <sub>46</sub> H <sub>90</sub> NO <sub>10</sub> P | -0.36 | 4.66 |
| 828.61012 | PS O-40:3      | Glycerophospholipids [GP] | C <sub>46</sub> H <sub>86</sub> NO <sub>9</sub> P  | -0.85 | 5.69 |
| 826.59464 | PS O-40:4      | Glycerophospholipids [GP] | C <sub>46</sub> H <sub>84</sub> NO <sub>9</sub> P  | -0.80 | 4.29 |
| 854.62672 | PS O-42:4      | Glycerophospholipids [GP] | C <sub>48</sub> H <sub>88</sub> NO <sub>9</sub> P  | 0.16  | 6.38 |
| 834.65893 | PS O-40:0      | Glycerophospholipids [GP] | C <sub>46</sub> H <sub>92</sub> NO <sub>9</sub> P  | 0.90  | 2.43 |
| 830.62581 | PS O-40:2      | Glycerophospholipids [GP] | C <sub>46</sub> H <sub>88</sub> NO <sub>9</sub> P  | -0.99 | 2.95 |



|           |                                                        |                                              |                                                                               |       |       |
|-----------|--------------------------------------------------------|----------------------------------------------|-------------------------------------------------------------------------------|-------|-------|
| 852.61055 | PS P-42:4                                              | Glycerophospholipids [GP]                    | C <sub>48</sub> H <sub>86</sub> NO <sub>9</sub> P                             | -0.52 | 6.70  |
| 804.57552 | PT 18:0/18:1                                           | Glycerophospholipids [GP]                    | C <sub>43</sub> H <sub>82</sub> NO <sub>10</sub> P                            | 0.74  | 7.92  |
| 133.01425 | Malic acid                                             | Hydroxy acids and derivatives                | C <sub>4</sub> H <sub>6</sub> O <sub>5</sub>                                  | 0.06  | 1.52  |
| 135.03117 | Hypoxanthine                                           | Imidazopyrimidines                           | C <sub>5</sub> H <sub>4</sub> N <sub>4</sub> O                                | 0.05  | 1.15  |
| 187.00282 | Xanthine                                               | Imidazopyrimidines                           | C <sub>5</sub> H <sub>4</sub> N <sub>4</sub> O <sub>2</sub>                   | -0.09 | 0.98  |
| 131.04622 | Ureidopropionic acid                                   | Organic carbonic acids and derivatives       | C <sub>4</sub> H <sub>8</sub> N <sub>2</sub> O <sub>3</sub>                   | 0.133 | 2.08  |
| 124.00739 | Taurine                                                | Organic sulfonic acids and derivatives       | C <sub>2</sub> H <sub>7</sub> NO <sub>3</sub> S                               | 0.06  | 3.17  |
| 162.11235 | Carnitine                                              | Organonitrogen compounds                     | C <sub>7</sub> H <sub>15</sub> NO <sub>3</sub>                                | 0.12  | 1.09  |
| 185.08125 | Phosphorylcholine                                      | Organonitrogen compounds                     | C <sub>3</sub> H <sub>7</sub> O <sub>7</sub> P                                | 0.49  | 2.31  |
| 150.11188 | Triethanolamine                                        | Organonitrogen compounds                     | C <sub>6</sub> H <sub>15</sub> NO <sub>3</sub>                                | 0.69  | 1.87  |
| 184.98567 | Phosphoglyceric acid                                   | Organooxygen compounds                       | C <sub>3</sub> H <sub>7</sub> O <sub>7</sub> P                                | -0.09 | 3.51  |
| 218.1034  | Pantothenic acid                                       | Organooxygen compounds/ Alcohols and polyols | C <sub>9</sub> H <sub>17</sub> NO <sub>5</sub>                                | 0.01  | 3.03  |
| 165.05449 | Phenylpyruvic acid                                     | Phenylpyruvic acid derivatives               | C <sub>9</sub> H <sub>8</sub> O <sub>3</sub>                                  | -0.26 | 7.88  |
| 489.11526 | Cytidine 5'-diphosphocholine                           | Pterins and derivatives                      | C <sub>14</sub> H <sub>26</sub> N <sub>4</sub> O <sub>11</sub> P <sub>2</sub> | 0.67  | 0.66  |
| 268.1037  | Adenosine                                              | Purine nucleosides                           | C <sub>10</sub> H <sub>13</sub> N <sub>5</sub> O <sub>4</sub>                 | 0.18  | 4.17  |
| 303.05018 | Inosine                                                | Purine nucleosides                           | C <sub>10</sub> H <sub>12</sub> N <sub>4</sub> O <sub>5</sub>                 | -0.04 | 0.36  |
| 346.0558  | Adenosine monophosphate (AMP)                          | Purine ribonucleotides                       | C <sub>10</sub> H <sub>14</sub> N <sub>5</sub> O <sub>7</sub> P               | -0.03 | 2.10  |
| 347.03981 | Inosinic acid                                          | Purine ribonucleotides                       | C <sub>10</sub> H <sub>13</sub> N <sub>4</sub> O <sub>8</sub> P               | -0.04 | 1.67  |
| 362.05077 | Guanosine monophosphate (GMP)                          | Purine ribonucleotides                       | C <sub>10</sub> H <sub>14</sub> N <sub>5</sub> O <sub>8</sub> P               | 0.04  | 3.32  |
| 166.0146  | Quinolinic acid                                        | Pyridines and derivatives                    | C <sub>7</sub> H <sub>5</sub> NO <sub>4</sub>                                 | 0.20  | 7.17  |
| 123.05499 | Nicotinamide                                           | Pyridine nucleotides                         | C <sub>6</sub> H <sub>6</sub> N <sub>2</sub> O                                | 0.30  | 1.92  |
| 112.0507  | Cytosine                                               | Pyrimidines and pyrimidine derivatives       | C <sub>4</sub> H <sub>5</sub> N <sub>3</sub> O                                | 0.16  | 1.38  |
| 265.11081 | Thiamine                                               | Pyrimidines and pyrimidine derivative        | C <sub>12</sub> H <sub>17</sub> N <sub>4</sub> OS                             | 0.43  | 1.57  |
| 111.01873 | Uracil                                                 | Pyrimidines and pyrimidine derivatives       | C <sub>4</sub> H <sub>4</sub> N <sub>2</sub> O <sub>2</sub>                   | 1.27  | 0.27  |
| 242.07832 | Cytidine                                               | Pyrimidine nucleosides                       | C <sub>9</sub> H <sub>13</sub> N <sub>3</sub> O <sub>5</sub>                  | 0.07  | 1.26  |
| 323.02855 | Orotidine                                              | Pyrimidine nucleosides                       | C <sub>10</sub> H <sub>12</sub> N <sub>2</sub> O <sub>8</sub>                 | -0.72 | 2.56  |
| 565.04834 | Uridine diphosphate glucose UDP-D-glucose              | Pyrimidine nucleotides                       | C <sub>15</sub> H <sub>24</sub> N <sub>2</sub> O <sub>17</sub> P <sub>2</sub> | 0.61  | 2.87  |
| 606.07312 | Uridine 5'-diphospho-N-acetylglucosamine (UDP-Glc-NAC) | Pyrimidine nucleotides                       | C <sub>17</sub> H <sub>27</sub> N <sub>3</sub> O <sub>17</sub> P <sub>2</sub> | 1.16  | 2.60  |
| 323.02963 | Uridine 5'-monophosphate                               | Pyrimidine nucleotides                       | C <sub>9</sub> H <sub>13</sub> N <sub>2</sub> O <sub>9</sub> P                | 1.04  | 2.48  |
| 243.0619  | Uridine                                                | Pyrimidine nucleosides                       | C <sub>9</sub> H <sub>12</sub> N <sub>2</sub> O <sub>6</sub>                  | 0.36  | 3.88  |
| 608.08728 | Uridine diphosphate-N-acetylgalactosamine (UDP-GalNAC) | Pyrimidine nucleotides                       | C <sub>17</sub> H <sub>27</sub> N <sub>3</sub> O <sub>17</sub> P <sub>2</sub> | 1.65  | 2.29  |
| 188.03533 | Kynurenic acid                                         | Quinoline carboxylic acids                   | C <sub>10</sub> H <sub>7</sub> NO <sub>3</sub>                                | -0.01 | 5.05  |
| 608.59766 | Cer 39:1;O2                                            | Sphingolipids [SP]                           | C <sub>39</sub> H <sub>77</sub> NO <sub>3</sub>                               | 0.07  | 2.42  |
| 700.56567 | CerP 40:1;O2                                           | Sphingolipids [SP]                           | C <sub>40</sub> H <sub>80</sub> NO <sub>6</sub> P                             | 0.65  | 2.90  |
| 670.52582 | HexCer 32:1;O2                                         | Sphingolipids [SP]                           | C <sub>38</sub> H <sub>73</sub> NO <sub>8</sub>                               | -0.97 | 9.21  |
| 744.59858 | HexCer 36:1;O3                                         | Sphingolipids [SP]                           | C <sub>42</sub> H <sub>81</sub> NO <sub>9</sub>                               | 0.03  | 1.41  |
| 742.58258 | HexCer 36:2;O3                                         | Sphingolipids [SP]                           | C <sub>42</sub> H <sub>79</sub> NO <sub>9</sub>                               | 0.24  | 6.60  |
| 740.60316 | HexCer 37:2;O2                                         | Sphingolipids [SP]                           | C <sub>43</sub> H <sub>81</sub> NO <sub>8</sub>                               | -0.43 | 9.76  |
| 756.59815 | HexCer 37:2;O3                                         | Sphingolipids [SP]                           | C <sub>43</sub> H <sub>81</sub> NO <sub>9</sub>                               | -0.44 | 9.19  |
| 754.61911 | HexCer 38:2;O2                                         | Sphingolipids [SP]                           | C <sub>44</sub> H <sub>83</sub> NO <sub>8</sub>                               | 0.15  | 4.97  |
| 786.68187 | HexCer 40:0;O2                                         | Sphingolipids [SP]                           | C <sub>46</sub> H <sub>91</sub> NO <sub>8</sub>                               | 0.45  | 0.66  |
| 784.64567 | SM 40:2;O2                                             | Sphingolipids [SP]                           | C <sub>45</sub> H <sub>89</sub> N <sub>2</sub> O <sub>6</sub> P               | 0.14  | 7.33  |
| 783.63721 | SM 40:3;O2                                             | Sphingolipids [SP]                           | C <sub>45</sub> H <sub>87</sub> N <sub>2</sub> O <sub>6</sub> P               | 0.18  | 10.88 |
| 455.3363  | ST 26:0;O6                                             | Sterol Lipids [ST]                           | C <sub>26</sub> H <sub>46</sub> O <sub>6</sub>                                | 0.11  | 2.11  |

#### S4: Metabolomics data processing

Thermo RAW. data files were converted to ABF format using Reifycs Abf (Analysis Base File) converter, subsequently alignment of Profile Q-Exactive files was performed with MS tolerance set at 0.01 for MS and 0.025 for MS/MS with retention time tolerance of 0.1 min. Minimum peak height for detection was set to 10000 amplitude value. Lipid identification was performed with internal Lipidblast library while metabolites with internal libraries ESI POS and ESI NEG All\_Public\_MS/MS. All metabolites were annotation were based on mass accuracy, isotopic pattern and spectral matching, rev.dot product, score cut off was 70%. All reported spectral matches were manually revised for correct assignment, adducts with sodium, formate and acetate were allowed for adduct correction. The alignment was performed only on matched MS/MS metabolites blank corrected. Direct infusion nano-electrospray was performed by an automated multisample chip-based nESI sample ionization platform TriVersa NanoMate (Advion BioSciences Ltd, Ithaca NY, U.S.A), which was operated with the following parameters: gas pressure (nitrogen) was 0.3 psi, spray voltage 1.45kV, sample volume was 5  $\mu$ L, sample plate temperature was set to 10°C, 5  $\mu$ m nominal internal diameter nozzle chip was used. DI-FT-ICR data analysis was performed with Metaboscape 2021 (Bruker). The first step is the creation of a matrix (bucket table) using the T-ReX 2D algorithm. The T-Rex 2D algorithm for feature extraction from FT-ICR single spectra extracts m/z / intensity pairs (peaks) from acquired raw data and subjects them to deisotoping in order to create features consisting of isotope patterns. Subsequently, spectra alignment, filtering, normalization were performed. The spectra were processed in positive mode using  $H^+$  as the primary ion,  $Na^+$  and  $NH_4^+$  as a potential adducts, while in negative mode  $H^-$  was set as the primary ion and  $Cl^-$  as a potential adduct. For metabolite annotation, assignment of the molecular formula was performed for the detected features using Smart Formula™ (SF), isotopic fine structure (ISF) and data recalibration. The bucket table was annotated with a list of metabolites and lipids obtained respectively from the HMDB (<https://hmdb.ca/>) and LIPIDMAPS database ([www.lipidmaps.org](http://www.lipidmaps.org)). Annotation was performed with 0.2 ppm (narrow) or 1 ppm (wide) mass tolerance and a mSigma value below 200, molecular formula were manually inspected taking into account the most probable adduct form.

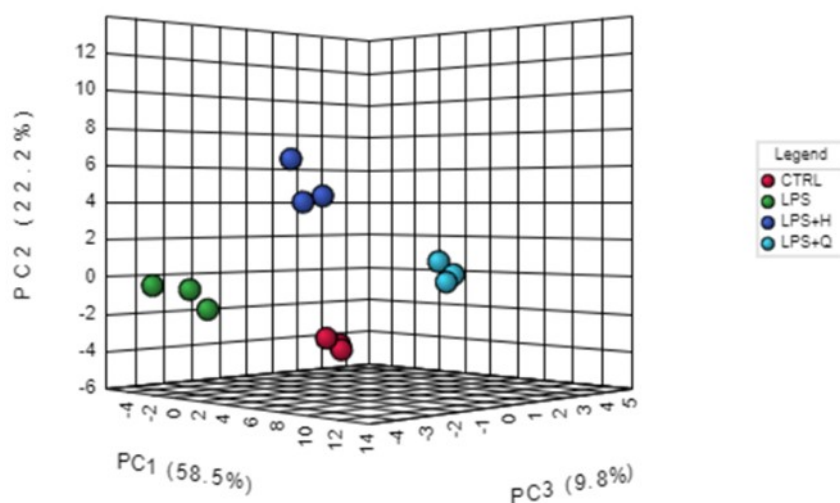

Figure S3: PCA 3D-score plot

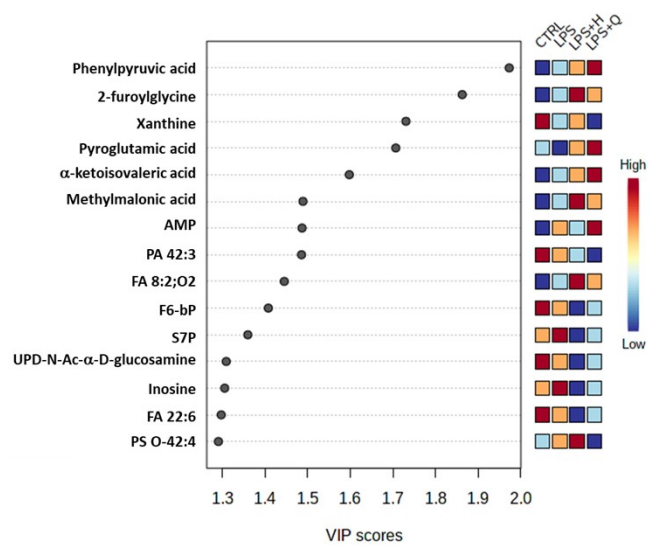

**Figure S4:** 15 high scoring VIP metabolites (VIP > 1.3) derived from PLS-DA analysis

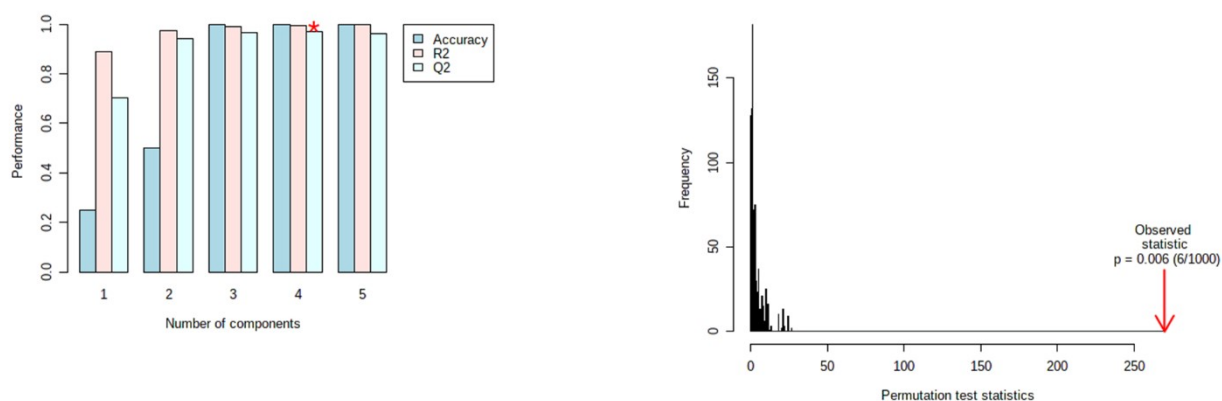

PLS-DA cross validation details:

| Measure  | 1 comps | 2 comps | 3 comps | 4 comps | 5 comps |
|----------|---------|---------|---------|---------|---------|
| Accuracy | 0.25    | 0.5     | 1.0     | 1.0     | 1.0     |
| R2       | 0.88932 | 0.97527 | 0.99178 | 0.99509 | 0.99917 |
| Q2       | 0.70159 | 0.94172 | 0.96723 | 0.97038 | 0.9612  |

**Figure S5:** Cross validation values and permutation test of PLS-DA model
